# Supplementary material for: Reduced El Niño variability in the mid-Pliocene according to the PlioMIP2 ensemble
Source: Copernicus journal article supplement (doi:10.5194/cp-2021-58), 2021-06-03
Supplement: Supplementary file 1 [file selected_data.xlsx]

## Sheet: Sheet1
Figure:	Subfigure:	Axis:	Name:	Unit:	CCSM4	CCSM4-UoT	CCSM4-Utr	CESM1.2	CESM2	COSMOS	EC-Earth3.3	GISS2.1G	HadCM3	HadGEM3	IPSLCM5A	IPSLCM5A2	IPSLCM6A	MIROC4m	MRI2.3	NorESM-L	NorESM1-F	ensemble mean	ensemble s.d.	HadISST 1920 - 2020
2	(a)	Hor.	E280 Niño3.4 s.d.	°C	1.05	0.71	1.06	0.98	1.16	1.67	0.60	1.26	0.67	0.89	0.68	0.85	1.03	0.47	0.84	0.74	0.57	0.90	0.29	0.77
		Ver.	Eoi400 Niño3.4 s.d.	°C	0.59	0.51	0.36	0.70	1.06	1.65	0.35	1.29	0.41	0.71	0.57	0.67	0.95	0.35	0.87	0.46	0.45	0.70	0.35
	(b)	Hor.	E280 Niño3.4 skewness	-	0.05	0.07	0.78	0.40	0.30	0.05	-0.35	-0.08	0.28	0.07	0.46	0.26	-0.06	0.06	0.25	-0.32	-0.12	0.12	0.28	0.32
		Ver.	Eoi400 Niño3.4 skewness	-	0.36	0.47	0.31	0.94	-0.12	0.19	0.19	-0.27	-0.07	-0.09	0.26	0.20	0.02	0.09	0.42	-0.06	0.03	0.17	0.28
	(c)	Hor.	E280 Niño3.4 kurtosis	-	0.09	0.21	1.32	0.73	-0.27	-0.50	0.58	-0.77	-0.32	0.52	0.36	0.06	-0.17	-0.26	0.33	0.02	0.39	0.14	0.49	0.51
		Ver.	Eoi400 Niño3.4 kurtosis	-	1.32	0.80	0.07	2.57	0.33	0.85	0.38	-0.86	0.22	0.09	0.11	-0.17	0.30	-0.07	0.68	0.26	0.53	0.44	0.71
6		Hor.	E280 N_WP s.d. / N_CT s.d.	-	0.64	0.93	0.78	1.00	0.82	1.11	0.68	0.39	1.02	0.58	0.70	0.82	0.74	1.05	0.90	0.89	0.37	0.79	0.21	0.58
		Ver.	Eoi400 N_WP s.d. / N_CT s.d.	-	0.76	0.89	0.91	0.92	0.97	1.11	0.53	0.37	1.41	0.72	0.71	0.78	0.91	0.71	0.89	0.69	0.48	0.81	0.24
9	(a)	Hor.	E280 zonal SST grad.	°C	4.40	5.03	4.39	4.01	4.53	3.14	3.87	2.77	2.80	4.20	3.87	3.98	4.03	3.18	1.33	4.61	4.46	3.80	0.88	4.09
		Ver.	Eoi400 zonal SST grad.	°C	4.36	4.26	4.04	3.62	3.30	4.65	3.17	2.44	2.41	3.58	3.81	3.96	4.08	2.88	3.28	3.84	4.03	3.63	0.62
	(b)	Hor.	Eoi400 - E280 zonal SST grad.	°C	-0.04	-0.76	-0.34	-0.39	-1.23	1.51	-0.70	-0.33	-0.39	-0.62	-0.06	-0.02	0.05	-0.30	1.95	-0.77	-0.43	-0.17	0.77
		Ver.	Change in Niño3.4 s.d.	%	-43.75	-28.75	-66.49	-28.65	-8.66	-1.63	-41.40	2.49	-38.30	-20.33	-16.43	-21.04	-7.43	-25.57	3.00	-37.96	-20.86	-23.63	17.94
10	(a)	Hor.	Mean SST changes to E280 EOF corr.	-	-0.31	0.37	-0.62	-0.03	0.63	0.54	-0.47	0.51	-0.12	0.48	-0.03	0.09	0.53	-0.03	-0.10	-0.04	-0.14	0.07	0.36
		Ver.	Change in Niño3.4 s.d.	%	-43.75	-28.75	-66.49	-28.65	-8.66	-1.63	-41.40	2.49	-38.30	-20.33	-16.43	-21.04	-7.43	-25.57	3.00	-37.96	-20.86	-23.63	17.94
